# Supplementary material for: Land Tenure Systems and their Impact on Food Security in Mbale, Bukedea, and Luwero Districts, Uganda: A cross-sectional study
Source: Research Square preprint supplement (doi:10.21203/rs.3.rs-6940553/v1), 2025-07-14
Supplement: Supplementary file 1 [file c285e0bd3568033d4ffd0f51.pdf]

**Study topic:** *An assessment of the applications of land tenure systems on food security of households to Mbale district, Uganda*

**Objective 1:** To assess the existing land tenure systems and their impact on food security in Mbale and Bukedea districts, Eastern Uganda and Luwero district in Buganda region

| No.                                       | Questions                                                 | Responses                                                                                                                                                                                                      | Skip |
|-------------------------------------------|-----------------------------------------------------------|----------------------------------------------------------------------------------------------------------------------------------------------------------------------------------------------------------------|------|
| <b>Section A: Respondent Demographics</b> |                                                           |                                                                                                                                                                                                                |      |
| A1                                        | What is your age?                                         | <input type="checkbox"/> Below 18,<br><input type="checkbox"/> 19-30,<br><input type="checkbox"/> 31-40,<br><input type="checkbox"/> 41-50,<br><input type="checkbox"/> 51+                                    |      |
| A2                                        | What is your gender?                                      | <input type="checkbox"/> Male,<br><input type="checkbox"/> Female,                                                                                                                                             |      |
| A3                                        | What is your highest level of education?                  | <input type="checkbox"/> None,<br><input type="checkbox"/> Primary,<br><input type="checkbox"/> Secondary,<br><input type="checkbox"/> Tertiary,<br><input type="checkbox"/> University                        |      |
| A4                                        | What is your occupation?                                  | <input type="checkbox"/> Farmer,<br><input type="checkbox"/> Trader,<br><input type="checkbox"/> Civil servant,<br><input type="checkbox"/> Other specify .....                                                |      |
| A5                                        | How long have you lived in this area?                     | <input type="checkbox"/> Less than 1 year,<br><input type="checkbox"/> 15 years,<br><input type="checkbox"/> 610 years,<br><input type="checkbox"/> 11+ years                                                  |      |
| A6                                        | Location                                                  | <input type="checkbox"/> Urban<br><input type="checkbox"/> Perurban<br><input type="checkbox"/> Rural                                                                                                          |      |
| A7                                        | Type of residence                                         | <input type="checkbox"/> Permanent<br><input type="checkbox"/> Temporary                                                                                                                                       |      |
| A8                                        | Monthly income level (UGX)                                | <input type="checkbox"/> Below 100,000 UGX<br><input type="checkbox"/> 100,000 – 500,000 UGX<br><input type="checkbox"/> 500,000 – 1,000,000 UGX<br><input type="checkbox"/> Above 1,000,000 UGX               |      |
| <b>Section B: Land Tenure System</b>      |                                                           |                                                                                                                                                                                                                |      |
| B1                                        | What is the primary land tenure system in your community? | <input type="checkbox"/> Customary,<br><input type="checkbox"/> Freehold,<br><input type="checkbox"/> Leasehold,<br><input type="checkbox"/> Crown land/Mailo land<br><input type="checkbox"/> Government land |      |
| B2                                        | Who owns the land in your household?                      | <input type="checkbox"/> Male head of household,<br><input type="checkbox"/> Female head of household,<br><input type="checkbox"/> Joint ownership,<br><input type="checkbox"/> Rented land                    |      |
| B3                                        | Do you feel secure about the ownership of your land?      | <input type="checkbox"/> Yes,<br><input type="checkbox"/> No                                                                                                                                                   |      |

|                                 |                                                                                                   |                                                                                                                                                                                                                                                                                                                                                    |                    |
|---------------------------------|---------------------------------------------------------------------------------------------------|----------------------------------------------------------------------------------------------------------------------------------------------------------------------------------------------------------------------------------------------------------------------------------------------------------------------------------------------------|--------------------|
| B4                              | How do you acquire land in this community?<br><br>(Tick all that apply)                           | <input type="checkbox"/> Inheritance,<br><input type="checkbox"/> Purchase,<br><input type="checkbox"/> Rent,<br><input type="checkbox"/> Government allocation,<br><input type="checkbox"/> Other specify .....                                                                                                                                   |                    |
| B5                              | Has your access to land changed in the past 5 years?                                              | <input type="checkbox"/> Yes,<br><input type="checkbox"/> No                                                                                                                                                                                                                                                                                       | If No, skip to Q12 |
| B6                              | If yes in q10, how has your access to land changed?                                               | <input type="checkbox"/> Gained more land,<br><input type="checkbox"/> Lost land,                                                                                                                                                                                                                                                                  |                    |
| B7                              | What challenges do you face in accessing land?                                                    | <input type="checkbox"/> Lack of documentation,<br><input type="checkbox"/> Conflicts with neighbours,<br><input type="checkbox"/> Inheritance issues,<br><input type="checkbox"/> Limited land for sale,<br><input type="checkbox"/> High land prices,<br><input type="checkbox"/> Policy changes<br><input type="checkbox"/> Other specify ..... |                    |
| B8                              | Does your community have clear land boundaries?                                                   | <input type="checkbox"/> Yes,<br><input type="checkbox"/> No                                                                                                                                                                                                                                                                                       |                    |
| B9                              | How often do land disputes occur in your area?                                                    | <input type="checkbox"/> Rarely,<br><input type="checkbox"/> Occasionally,<br><input type="checkbox"/> Frequently,<br><input type="checkbox"/> Never                                                                                                                                                                                               |                    |
| B10                             | Who typically resolves land disputes in your community?                                           | <input type="checkbox"/> Elders,<br><input type="checkbox"/> Local council,<br><input type="checkbox"/> Court,<br><input type="checkbox"/> Other specify .....                                                                                                                                                                                     |                    |
| B11                             | Are you aware of any land policies or laws that govern land ownership in your area?               | <input type="checkbox"/> Yes,<br><input type="checkbox"/> No                                                                                                                                                                                                                                                                                       |                    |
| B12                             | Have you encountered any problems with land ownership or disputes affecting your food production? | <input type="checkbox"/> Yes,<br><input type="checkbox"/> No                                                                                                                                                                                                                                                                                       | If No, skip to Q20 |
| B13                             | If yes, please explain how land disputes have impacted your food production.                      | <input type="checkbox"/> Low production<br><input type="checkbox"/> Limited storage of crop yield<br><input type="checkbox"/> Limited perennial crop production<br><input type="checkbox"/> Others specify .....                                                                                                                                   |                    |
| B14                             | How often do you face challenges in cultivating enough food for your household?                   | <input type="checkbox"/> Rarely,<br><input type="checkbox"/> Occasionally,<br><input type="checkbox"/> Frequently,<br><input type="checkbox"/> Never                                                                                                                                                                                               |                    |
| <b>Section C: Food Security</b> |                                                                                                   |                                                                                                                                                                                                                                                                                                                                                    |                    |
| C1                              | What type of crops do you grow on your land?                                                      | <input type="checkbox"/> Maize,<br><input type="checkbox"/> Beans,<br><input type="checkbox"/> Cassava,<br><input type="checkbox"/> Rice,<br><input type="checkbox"/> Vegetables,<br><input type="checkbox"/> Other specify .....                                                                                                                  |                    |
| C2                              | Do you have enough land to grow sufficient food for your household?                               | <input type="checkbox"/> Yes,<br><input type="checkbox"/> No                                                                                                                                                                                                                                                                                       |                    |

|     |                                                                                                        |                                                                                                                                                                                 |                    |
|-----|--------------------------------------------------------------------------------------------------------|---------------------------------------------------------------------------------------------------------------------------------------------------------------------------------|--------------------|
| C3  | Have you ever had to rely on food assistance in the past year?                                         | <input type="checkbox"/> Yes,<br><input type="checkbox"/> No                                                                                                                    | If No, skip to Q24 |
| C4  | If yes, how often did you need food assistance in the past year?                                       | <input type="checkbox"/> Once,<br><input type="checkbox"/> 2 times,<br><input type="checkbox"/> 3 times<br><input type="checkbox"/> 4+ times                                    |                    |
| C5  | What is your main source of food when homegrown food is not available?                                 | <input type="checkbox"/> Market purchase,<br><input type="checkbox"/> Family and friends,<br><input type="checkbox"/> Food aid,<br><input type="checkbox"/> Other specify ..... |                    |
| C6  | How does the land tenure system affect your food security?                                             | <input type="checkbox"/> Positively,<br><input type="checkbox"/> Negatively,<br><input type="checkbox"/> No impact                                                              |                    |
| C7  | Do you use your land for both subsistence and commercial farming?                                      | <input type="checkbox"/> Yes,<br><input type="checkbox"/> No                                                                                                                    |                    |
| C8  | If yes, which crops do you sell, and how do sales impact your household's food security?               | .....                                                                                                                                                                           |                    |
| C9  | How do seasonal variations (e.g., drought, floods) affect your food security?                          | <input type="checkbox"/> Major impact,<br><input type="checkbox"/> Minor impact,<br><input type="checkbox"/> No impact                                                          |                    |
| C10 | Do you have access to irrigation for your crops?                                                       | <input type="checkbox"/> Yes,<br><input type="checkbox"/> No                                                                                                                    |                    |
| C11 | If no, would irrigation improve your food security?                                                    | <input type="checkbox"/> Yes,<br><input type="checkbox"/> No                                                                                                                    |                    |
| C12 | Have you adopted any farming technologies or practices in the last 5 years to improve food production? | <input type="checkbox"/> Yes,<br><input type="checkbox"/> No                                                                                                                    |                    |
| C13 | If yes, which technologies or practices have you adopted?                                              | .....                                                                                                                                                                           |                    |
| C14 | How would you describe the quality of soil on your land?                                               | <input type="checkbox"/> Poor,<br><input type="checkbox"/> Fair,<br><input type="checkbox"/> Good,<br><input type="checkbox"/> Excellent                                        |                    |
| C15 | Have you faced any issues related to soil fertility in the past year?                                  | <input type="checkbox"/> Yes,<br><input type="checkbox"/> No                                                                                                                    | If No, skip to Q36 |
| C16 | If yes, how have soil fertility issues impacted your food security?                                    | .....                                                                                                                                                                           |                    |
| C17 | Do you have access to agricultural extension services in your area?                                    | <input type="checkbox"/> Yes,<br><input type="checkbox"/> No                                                                                                                    |                    |
| C18 | If yes, how frequently do you use agricultural extension services?                                     | <input type="checkbox"/> Regularly,<br><input type="checkbox"/> Occasionally,<br><input type="checkbox"/> Rarely,<br><input type="checkbox"/> Never                             |                    |
| C19 | How has the availability of extension services affected your food production?                          | <input type="checkbox"/> Improved,<br><input type="checkbox"/> No effect,<br><input type="checkbox"/> Worsened                                                                  |                    |

|                                                           |                                                                                                                                             |                                                                                                                                                                                                                                                                                             |                    |
|-----------------------------------------------------------|---------------------------------------------------------------------------------------------------------------------------------------------|---------------------------------------------------------------------------------------------------------------------------------------------------------------------------------------------------------------------------------------------------------------------------------------------|--------------------|
| C20                                                       | What role does community support (e.g., farming groups, cooperatives) play in your food security?                                           | <input type="checkbox"/> Major role,<br><input type="checkbox"/> Minor role,<br><input type="checkbox"/> No role                                                                                                                                                                            |                    |
| C21                                                       | Have you faced any barriers in accessing credit or loans for agricultural activities?                                                       | <input type="checkbox"/> Yes,<br><input type="checkbox"/> No                                                                                                                                                                                                                                | If No, skip to Q42 |
| C22                                                       | If yes, what are the main barriers?                                                                                                         | <input type="checkbox"/> High interest rates,<br><input type="checkbox"/> Lack of collateral,<br><input type="checkbox"/> Limited financial institutions,<br><input type="checkbox"/> Other specify .....                                                                                   |                    |
| C23                                                       | Do you use any kind of risk management strategies to protect your crops or livestock?                                                       | <input type="checkbox"/> Yes,<br><input type="checkbox"/> No                                                                                                                                                                                                                                |                    |
| C24                                                       | How has the land tenure system impacted your ability to invest in longterm agricultural improvements (e.g., irrigation, soil conservation)? | <input type="checkbox"/> Positive,<br><input type="checkbox"/> Negative,<br><input type="checkbox"/> No impact                                                                                                                                                                              |                    |
| C25                                                       | Do you believe food security in your area has improved, worsened, or remained the same in the last 5 years?                                 | <input type="checkbox"/> Improved,<br><input type="checkbox"/> Worsened,<br><input type="checkbox"/> Stayed the same                                                                                                                                                                        |                    |
| C26                                                       | What do you believe are the main factors affecting food security in your community?                                                         | <input type="checkbox"/> Land tenure system,<br><input type="checkbox"/> Climate change,<br><input type="checkbox"/> Market access,<br><input type="checkbox"/> Education and training,<br><input type="checkbox"/> Lack of infrastructure,<br><input type="checkbox"/> Other specify ..... |                    |
| <b>Section D: Agricultural Practices and Food Storage</b> |                                                                                                                                             |                                                                                                                                                                                                                                                                                             |                    |
| D1                                                        | How do you store your food for consumption during the offseason?                                                                            | <input type="checkbox"/> Drying,<br><input type="checkbox"/> Granary,<br><input type="checkbox"/> Freezing,<br><input type="checkbox"/> Stores,<br><input type="checkbox"/> None                                                                                                            |                    |
| D2                                                        | Have you experienced any pest or disease problems affecting your food production?                                                           | <input type="checkbox"/> Yes,<br><input type="checkbox"/> No                                                                                                                                                                                                                                | If No, skip to Q50 |
| D3                                                        | If yes, how have pest or disease issues affected your food security?                                                                        | .....                                                                                                                                                                                                                                                                                       |                    |
| D4                                                        | Do you rotate crops or use other crop management strategies to ensure food security?                                                        | <input type="checkbox"/> Yes,<br><input type="checkbox"/> No                                                                                                                                                                                                                                |                    |
| D5                                                        | How important are cash crops (e.g., coffee, cotton) to your household's food security?                                                      | <input type="checkbox"/> Very important,<br><input type="checkbox"/> Somewhat important,<br><input type="checkbox"/> Not important                                                                                                                                                          |                    |
| D6                                                        | How often do you face challenges in accessing markets for your agricultural products?                                                       | <input type="checkbox"/> Never,<br><input type="checkbox"/> Rarely,<br><input type="checkbox"/> Occasionally,<br><input type="checkbox"/> Frequently                                                                                                                                        |                    |
| D7                                                        | How does the distance to the nearest market affect your food security?                                                                      | <input type="checkbox"/> Major impact,<br><input type="checkbox"/> Minor impact,<br><input type="checkbox"/> No impact                                                                                                                                                                      |                    |

|                                                        |                                                                                                   |                                                                                                                                                                            |                    |
|--------------------------------------------------------|---------------------------------------------------------------------------------------------------|----------------------------------------------------------------------------------------------------------------------------------------------------------------------------|--------------------|
| D8                                                     | Do you sell any food items to other households in your community?                                 | <input type="checkbox"/> Yes,<br><input type="checkbox"/> No                                                                                                               | If No, skip to Q56 |
| D9                                                     | If yes, how does this income affect your household's food security?                               | .....                                                                                                                                                                      |                    |
| D10                                                    | Do you engage in any form of intercropping to maximize food production?                           | <input type="checkbox"/> Yes,<br><input type="checkbox"/> No                                                                                                               |                    |
| D11                                                    | If yes, which crops do you intercrop?                                                             | .....                                                                                                                                                                      |                    |
| <b>Section E: Access to Support and Climate Change</b> |                                                                                                   |                                                                                                                                                                            |                    |
| E1                                                     | Do you participate in any government programs related to agriculture or food security?            | <input type="checkbox"/> Yes,<br><input type="checkbox"/> No                                                                                                               |                    |
| E2                                                     | If yes, which programs have you benefited from?                                                   | .....                                                                                                                                                                      |                    |
| E3                                                     | How would you rate the availability of clean water for agricultural and household use?            | <input type="checkbox"/> Very available,<br><input type="checkbox"/> Somewhat available,<br><input type="checkbox"/> Not available                                         |                    |
| E4                                                     | Do you practice any form of soil conservation?                                                    | <input type="checkbox"/> Yes,<br><input type="checkbox"/> No                                                                                                               |                    |
| E5                                                     | If yes, what type of soil conservation practices do you use?                                      | .....                                                                                                                                                                      |                    |
| E6                                                     | What is the main source of water for your crops and livestock?                                    | <input type="checkbox"/> Rainfed,<br><input type="checkbox"/> Irrigated,<br><input type="checkbox"/> Mixed,<br><input type="checkbox"/> Other specify .....                |                    |
| E7                                                     | What is the most common type of irrigation system used in your area?                              | <input type="checkbox"/> Drip irrigation,<br><input type="checkbox"/> Flood irrigation,<br><input type="checkbox"/> Rainwater harvesting,<br><input type="checkbox"/> None |                    |
| E8                                                     | Have you experienced a decline in the fertility of your land in recent years?                     | <input type="checkbox"/> Yes,<br><input type="checkbox"/> No                                                                                                               | If No, skip to Q67 |
| E9                                                     | If yes, what measures have you taken to improve soil fertility?                                   | .....                                                                                                                                                                      |                    |
| E10                                                    | Do you believe that your community has sufficient training on sustainable agricultural practices? | <input type="checkbox"/> Yes,<br><input type="checkbox"/> No                                                                                                               |                    |
| E11                                                    | Are you aware of any land reforms or changes in the land tenure system in your area?              | <input type="checkbox"/> Yes,<br><input type="checkbox"/> No                                                                                                               |                    |
| E12                                                    | How do you feel about the current land tenure laws and policies?                                  | <input type="checkbox"/> Positive,<br><input type="checkbox"/> Negative,<br><input type="checkbox"/> Neutral                                                               |                    |
| E13                                                    | Do women have equal access to land as men in your community?                                      | <input type="checkbox"/> Yes,<br><input type="checkbox"/> No                                                                                                               |                    |
| E14                                                    | If no, how does this inequality affect food security?                                             | .....                                                                                                                                                                      |                    |

|                                                 |                                                                                          |                                                                                                                                                                                                                                                                                                                                  |  |
|-------------------------------------------------|------------------------------------------------------------------------------------------|----------------------------------------------------------------------------------------------------------------------------------------------------------------------------------------------------------------------------------------------------------------------------------------------------------------------------------|--|
| E15                                             | Do you face challenges in gaining land rights as a woman or young person?                | <input type="checkbox"/> Yes,<br><input type="checkbox"/> No                                                                                                                                                                                                                                                                     |  |
| E16                                             | If yes, what barriers prevent you from accessing land?                                   | .....                                                                                                                                                                                                                                                                                                                            |  |
| <b>Section F: Climate Change and Adaptation</b> |                                                                                          |                                                                                                                                                                                                                                                                                                                                  |  |
| F1                                              | How does climate change (e.g., extreme weather events) impact your food production?      | <input type="checkbox"/> Major impact,<br><input type="checkbox"/> Minor impact,<br><input type="checkbox"/> No impact                                                                                                                                                                                                           |  |
| F2                                              | What measures have you taken to adapt to climate change and protect your food security?  | .....                                                                                                                                                                                                                                                                                                                            |  |
| F3                                              | Do you use any indigenous knowledge or traditional methods in farming?                   | <input type="checkbox"/> Yes,<br><input type="checkbox"/> No                                                                                                                                                                                                                                                                     |  |
| F4                                              | If yes, what traditional methods do you use?                                             | <input type="checkbox"/> Slash and burn<br><input type="checkbox"/> Crop rotation<br><input type="checkbox"/> Mixed cropping (Intercropping)<br><input type="checkbox"/> Use of organic manure<br><input type="checkbox"/> Mulching<br><input type="checkbox"/> Seed preservation<br><input type="checkbox"/> Other specify..... |  |
| F5                                              | Are there any government or NGO initiatives that have helped improve your food security? | <input type="checkbox"/> Yes,<br><input type="checkbox"/> No                                                                                                                                                                                                                                                                     |  |
| F6                                              | If yes, how have these initiatives helped you?                                           | .....                                                                                                                                                                                                                                                                                                                            |  |
| F7                                              | How can the government improve land policies to enhance food security in your community? | .....                                                                                                                                                                                                                                                                                                                            |  |
